# Supplementary material for: The BCKDK inhibitor BT2 is a chemical uncoupler that lowers mitochondrial ROS production and de novo lipogenesis
Source: PubMed Central journal article supplement (PMC10910128; doi:10.1016/j.jbc.2024.105702), 2024-01-30
Supplement: mmc1.pdf [file mmc1.pdf]

## **SUPPORTING INFORMATION**

“The BCKDK inhibitor BT2 is a chemical uncoupler that lowers mitochondrial ROS production and *de novo* lipogenesis”

Includes:

Supporting Information Figure S1 – BT2 uncouples in cultured cells with varying levels of BCAA oxidation.

Supporting Information Figure S2 – 200 $\mu$ M BT2 results in proton conductance measurements that cannot be accurately quantified

Supporting Table 1 – ISA modeled values and 95% confidence intervals for individual technical replicates

**Supporting Information Figure S1 – BT2 uncouples in cultured cells with varying levels of BCAA oxidation.**

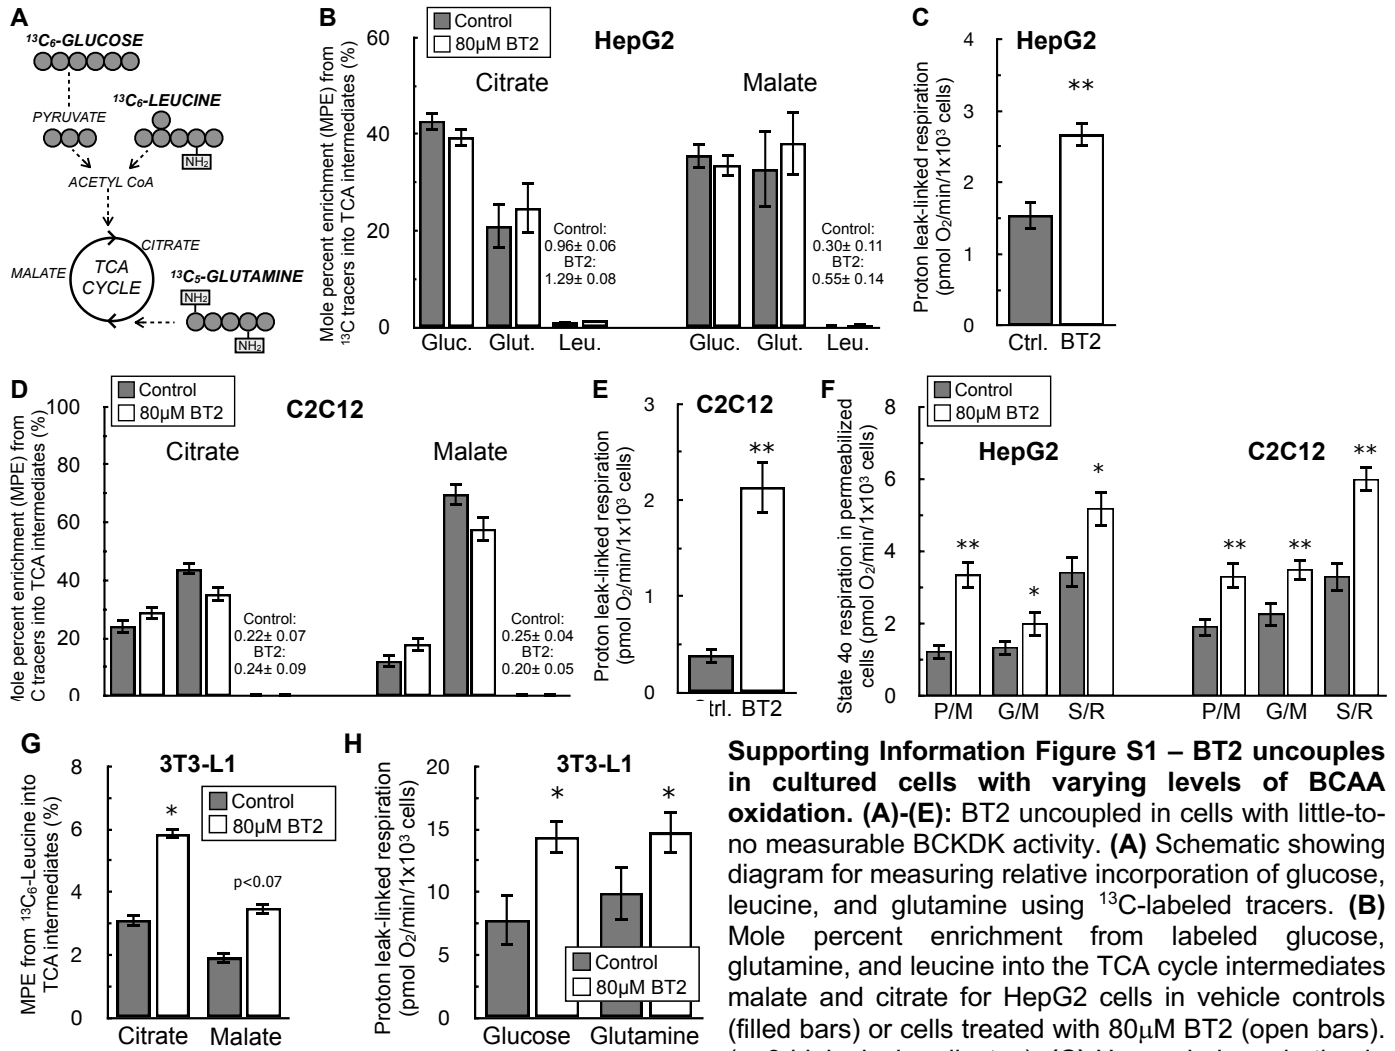

**Supporting Information Figure S1 – BT2 uncouples in cultured cells with varying levels of BCAA oxidation. (A)-(E):** BT2 uncoupled in cells with little-to-no measurable BCKDK activity. **(A)** Schematic showing diagram for measuring relative incorporation of glucose, leucine, and glutamine using  $^{13}\text{C}$ -labeled tracers. **(B)** Mole percent enrichment from labeled glucose, glutamine, and leucine into the TCA cycle intermediates malate and citrate for HepG2 cells in vehicle controls (filled bars) or cells treated with 80  $\mu\text{M}$  BT2 (open bars). (n=3 biological replicates). **(C)** Uncoupled respiration in

HepG2 cells offered glucose, glutamine, and pyruvate in DMEM assay medium. (n=4 biological replicates). **(D)** Mole percent enrichment from labeled glucose, glutamine, and leucine into the TCA cycle intermediates malate and citrate for C2C12 myoblasts in vehicle controls (filled bars) or treated with 80  $\mu\text{M}$  BT2 (open bars). (n=4 biological replicates). **(E)** Uncoupled respiration in C2C12 cells offered glucose, glutamine, and pyruvate in DMEM assay medium. (n=3 biological replicates). **(F)** BT2 uncouples respiration in permeabilized cells with substrates that bypass BCKDK: State 4<sub>o</sub> respiration in permeabilized HepG2 (left) and C2C12 (right) cells in vehicle controls (filled bars) or cells treated with 80  $\mu\text{M}$  BT2 (open bars). Permeabilized cells were offered pyruvate/malate (P/M), glutamate/malate (G/M), or succinate/rotenone (S/R). [n=4 (C2C12) or n=5 (HepG2) biological replicates]. **(G)-(H):** As a 'positive control' for measurable leucine oxidation, 3T3-L1 adipocytes show BT2 behaves as expected, but uncouples irrespective of the respiratory substrate provided. **(G)** Mole percent enrichment from uniformly labeled  $^{13}\text{C}_6$ -leucine in differentiated 3T3-L1 adipocytes in vehicle controls (filled bars) or cells treated with 80  $\mu\text{M}$  BT2 (open bars). (n=4 biological replicates) **(H)** Uncoupled respiration in differentiated 3T3-L1 adipocytes in the presence or absence of BT2 as before. Cells were assayed in a simple-salts, Krebs-Henseleit buffer supplemented with either glucose or glutamine. (n=3 biological replicates). All data are presented as mean  $\pm$  S.E.M.

**Supporting Information Figure S2 – 200 $\mu$ M BT2 results in proton conductance measurements that cannot be accurately quantified**

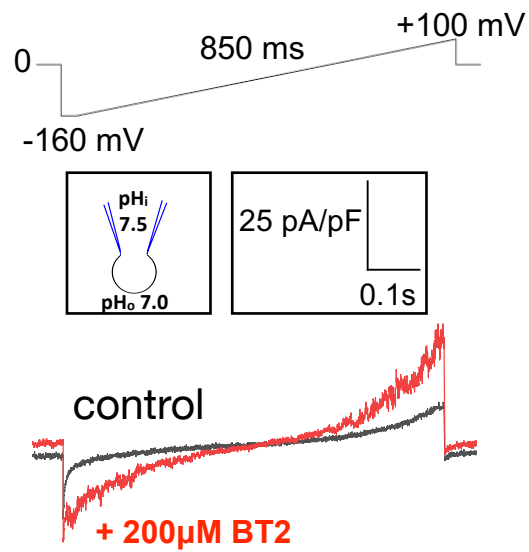

**Supporting Information Figure S2:** Patch-clamp electrophysiology with cardiac mitoplasts demonstrates that 200 $\mu$ M BT2 yields a bigger current amplitude than 100 $\mu$ M, but disrupts the integrity of the inner membrane. As such, a proton conductance cannot be reliably quantified.

**Supporting Information Table S1: ISA modeled values and 95% confidence intervals for individual technical replicates.**

| Sample   | Measurement              | Value | Lower range | Upper range | Sample   | Measurement              | Value | Lower range | Upper range |
|----------|--------------------------|-------|-------------|-------------|----------|--------------------------|-------|-------------|-------------|
| N1-NT1   | D(M2-AcCoA)              | 0.309 | 0.264       | 0.353       | N3-NT1   | D(M2-AcCoA)              | 0.558 | 0.509       | 0.605       |
|          | D(M1-AcCoA)              | 0.027 | 0.006       | 0.052       |          | D(M1-AcCoA)              | 0.034 | 0.010       | 0.066       |
|          | 1-D(AcCoA)               | 0.665 | 0.621       | 0.708       |          | 1-D(AcCoA)               | 0.408 | 0.360       | 0.457       |
|          | g(t) palmitate           | 0.419 | 0.375       | 0.459       |          | g(t) palmitate           | 0.456 | 0.408       | 0.498       |
|          | TOTAL AcCoA contribution | 0.335 | 0.270       | 0.405       |          | TOTAL AcCoA contribution | 0.592 | 0.519       | 0.671       |
| N1-NT2   | D(M2-AcCoA)              | 0.288 | 0.240       | 0.335       | N3-NT2   | D(M2-AcCoA)              | 0.292 | 0.236       | 0.348       |
|          | D(M1-AcCoA)              | 0.027 | 0.006       | 0.055       |          | D(M1-AcCoA)              | 0.030 | 0.005       | 0.065       |
|          | 1-D(AcCoA)               | 0.685 | 0.638       | 0.731       |          | 1-D(AcCoA)               | 0.677 | 0.624       | 0.730       |
|          | g(t) palmitate           | 0.394 | 0.349       | 0.435       |          | g(t) palmitate           | 0.354 | 0.307       | 0.396       |
|          | TOTAL AcCoA contribution | 0.315 | 0.246       | 0.390       |          | TOTAL AcCoA contribution | 0.323 | 0.241       | 0.412       |
| N1-NT3   | D(M2-AcCoA)              | 0.244 | 0.194       | 0.291       | N3-NT3   | D(M2-AcCoA)              | 0.326 | 0.248       | 0.398       |
|          | D(M1-AcCoA)              | 0.032 | 0.009       | 0.064       |          | D(M1-AcCoA)              | 0.030 | 0.000       | 0.078       |
|          | 1-D(AcCoA)               | 0.724 | 0.678       | 0.769       |          | 1-D(AcCoA)               | 0.644 | 0.574       | 0.715       |
|          | g(t) palmitate           | 0.395 | 0.348       | 0.437       |          | g(t) palmitate           | 0.262 | 0.211       | 0.306       |
|          | TOTAL AcCoA contribution | 0.276 | 0.204       | 0.355       |          | TOTAL AcCoA contribution | 0.356 | 0.248       | 0.476       |
| N1-BT2-1 | D(M2-AcCoA)              | 0.322 | 0.255       | 0.385       | N3-BT2-1 | D(M2-AcCoA)              | 0.327 | 0.282       | 0.372       |
|          | D(M1-AcCoA)              | 0.029 | 0.000       | 0.070       |          | D(M1-AcCoA)              | 0.023 | 0.002       | 0.048       |
|          | 1-D(AcCoA)               | 0.650 | 0.588       | 0.712       |          | 1-D(AcCoA)               | 0.650 | 0.605       | 0.694       |
|          | g(t) palmitate           | 0.285 | 0.236       | 0.329       |          | g(t) palmitate           | 0.366 | 0.325       | 0.403       |
|          | TOTAL AcCoA contribution | 0.350 | 0.255       | 0.455       |          | TOTAL AcCoA contribution | 0.350 | 0.284       | 0.420       |
| N1-BT2-2 | D(M2-AcCoA)              | 0.299 | 0.221       | 0.370       | N3-BT2-2 | D(M2-AcCoA)              | 0.295 | 0.223       | 0.362       |
|          | D(M1-AcCoA)              | 0.030 | 0.000       | 0.079       |          | D(M1-AcCoA)              | 0.030 | 0.000       | 0.075       |
|          | 1-D(AcCoA)               | 0.671 | 0.603       | 0.739       |          | 1-D(AcCoA)               | 0.675 | 0.611       | 0.739       |
|          | g(t) palmitate           | 0.258 | 0.209       | 0.303       |          | g(t) palmitate           | 0.235 | 0.191       | 0.274       |
|          | TOTAL AcCoA contribution | 0.329 | 0.221       | 0.449       |          | TOTAL AcCoA contribution | 0.325 | 0.223       | 0.437       |
| N1-BT2-3 | D(M2-AcCoA)              | 0.231 | 0.076       | 0.320       | N3-BT2-3 | D(M2-AcCoA)              | 0.316 | 0.245       | 0.383       |
|          | D(M1-AcCoA)              | 0.046 | 0.004       | 0.169       |          | D(M1-AcCoA)              | 0.028 | 0.000       | 0.072       |
|          | 1-D(AcCoA)               | 0.723 | 0.646       | 0.826       |          | 1-D(AcCoA)               | 0.655 | 0.591       | 0.720       |
|          | g(t) palmitate           | 0.275 | 0.218       | 0.325       |          | g(t) palmitate           | 0.248 | 0.202       | 0.289       |
|          | TOTAL AcCoA contribution | 0.277 | 0.079       | 0.489       |          | TOTAL AcCoA contribution | 0.345 | 0.245       | 0.455       |
| N1-DNP-1 | D(M2-AcCoA)              | 0.355 | 0.236       | 0.455       | N3-DNP-1 | D(M2-AcCoA)              | 0.551 | 0.483       | 0.615       |
|          | D(M1-AcCoA)              | 0.024 | 0.000       | 0.095       |          | D(M1-AcCoA)              | 0.023 | 0.000       | 0.062       |
|          | 1-D(AcCoA)               | 0.621 | 0.524       | 0.721       |          | 1-D(AcCoA)               | 0.426 | 0.360       | 0.495       |
|          | g(t) palmitate           | 0.197 | 0.141       | 0.247       |          | g(t) palmitate           | 0.111 | 0.088       | 0.134       |
|          | TOTAL AcCoA contribution | 0.379 | 0.236       | 0.550       |          | TOTAL AcCoA contribution | 0.574 | 0.483       | 0.677       |
| N1-DNP-2 | D(M2-AcCoA)              | 0.387 | 0.243       | 0.505       | N3-DNP-2 | D(M2-AcCoA)              | 0.338 | 0.000       | 0.483       |
|          | D(M1-AcCoA)              | 0.022 | 0.000       | 0.105       |          | D(M1-AcCoA)              | 0.031 | 0.000       | 0.287       |
|          | 1-D(AcCoA)               | 0.591 | 0.476       | 0.713       |          | 1-D(AcCoA)               | 0.631 | 0.492       | 0.993       |
|          | g(t) palmitate           | 0.171 | 0.114       | 0.221       |          | g(t) palmitate           | 0.175 | 0.110       | 0.231       |
|          | TOTAL AcCoA contribution | 0.409 | 0.243       | 0.610       |          | TOTAL AcCoA contribution | 0.369 | 0.000       | 0.770       |
| N1-DNP-3 | D(M2-AcCoA)              | 0.346 | 0.201       | 0.456       | N3-DNP-3 | D(M2-AcCoA)              | 0.295 | 0.178       | 0.386       |
|          | D(M1-AcCoA)              | 0.025 | 0.000       | 0.109       |          | D(M1-AcCoA)              | 0.029 | 0.000       | 0.100       |
|          | 1-D(AcCoA)               | 0.629 | 0.524       | 0.743       |          | 1-D(AcCoA)               | 0.677 | 0.592       | 0.766       |
|          | g(t) palmitate           | 0.178 | 0.123       | 0.228       |          | g(t) palmitate           | 0.172 | 0.127       | 0.212       |
|          | TOTAL AcCoA contribution | 0.371 | 0.201       | 0.565       |          | TOTAL AcCoA contribution | 0.323 | 0.178       | 0.486       |
| N2-NT1   | D(M2-AcCoA)              | 0.224 | 0.187       | 0.260       | N4-NT1   | D(M2-AcCoA)              | 0.346 | 0.306       | 0.386       |
|          | D(M1-AcCoA)              | 0.031 | 0.012       | 0.054       |          | D(M1-AcCoA)              | 0.023 | 0.004       | 0.045       |
|          | 1-D(AcCoA)               | 0.746 | 0.711       | 0.780       |          | 1-D(AcCoA)               | 0.631 | 0.591       | 0.672       |
|          | g(t) palmitate           | 0.395 | 0.358       | 0.430       |          | g(t) palmitate           | 0.378 | 0.340       | 0.412       |
|          | TOTAL AcCoA contribution | 0.254 | 0.198       | 0.314       |          | TOTAL AcCoA contribution | 0.369 | 0.309       | 0.431       |
| N2-NT2   | D(M2-AcCoA)              | 0.387 | 0.337       | 0.436       | N4-NT2   | D(M2-AcCoA)              | 0.523 | 0.475       | 0.571       |
|          | D(M1-AcCoA)              | 0.024 | 0.002       | 0.052       |          | D(M1-AcCoA)              | 0.029 | 0.007       | 0.059       |
|          | 1-D(AcCoA)               | 0.589 | 0.540       | 0.638       |          | 1-D(AcCoA)               | 0.447 | 0.399       | 0.496       |
|          | g(t) palmitate           | 0.420 | 0.373       | 0.462       |          | g(t) palmitate           | 0.429 | 0.383       | 0.470       |
|          | TOTAL AcCoA contribution | 0.411 | 0.339       | 0.488       |          | TOTAL AcCoA contribution | 0.553 | 0.481       | 0.630       |
| N2-NT3   | D(M2-AcCoA)              | 0.249 | 0.203       | 0.293       | N4-NT3   | D(M2-AcCoA)              | 0.435 | 0.381       | 0.489       |
|          | D(M1-AcCoA)              | 0.030 | 0.008       | 0.059       |          | D(M1-AcCoA)              | 0.023 | 0.000       | 0.052       |
|          | 1-D(AcCoA)               | 0.721 | 0.679       | 0.763       |          | 1-D(AcCoA)               | 0.541 | 0.487       | 0.595       |
|          | g(t) palmitate           | 0.393 | 0.350       | 0.432       |          | g(t) palmitate           | 0.412 | 0.363       | 0.455       |
|          | TOTAL AcCoA contribution | 0.279 | 0.212       | 0.352       |          | TOTAL AcCoA contribution | 0.459 | 0.381       | 0.541       |
| N2-BT2-1 | D(M2-AcCoA)              | 0.398 | 0.295       | 0.492       | N4-BT2-1 | D(M2-AcCoA)              | 0.300 | 0.246       | 0.352       |
|          | D(M1-AcCoA)              | 0.029 | 0.000       | 0.094       |          | D(M1-AcCoA)              | 0.026 | 0.001       | 0.058       |
|          | 1-D(AcCoA)               | 0.573 | 0.480       | 0.669       |          | 1-D(AcCoA)               | 0.674 | 0.624       | 0.724       |
|          | g(t) palmitate           | 0.231 | 0.172       | 0.281       |          | g(t) palmitate           | 0.266 | 0.226       | 0.302       |
|          | TOTAL AcCoA contribution | 0.427 | 0.295       | 0.586       |          | TOTAL AcCoA contribution | 0.326 | 0.247       | 0.411       |
| N2-BT2-2 | D(M2-AcCoA)              | 0.282 | 0.203       | 0.354       | N4-BT2-2 | D(M2-AcCoA)              | 0.317 | 0.266       | 0.367       |
|          | D(M1-AcCoA)              | 0.032 | 0.000       | 0.084       |          | D(M1-AcCoA)              | 0.023 | 0.000       | 0.053       |
|          | 1-D(AcCoA)               | 0.685 | 0.619       | 0.753       |          | 1-D(AcCoA)               | 0.660 | 0.611       | 0.709       |
|          | g(t) palmitate           | 0.279 | 0.227       | 0.325       |          | g(t) palmitate           | 0.232 | 0.198       | 0.263       |
|          | TOTAL AcCoA contribution | 0.315 | 0.203       | 0.437       |          | TOTAL AcCoA contribution | 0.340 | 0.266       | 0.420       |
| N2-BT2-3 | D(M2-AcCoA)              | 0.369 | 0.271       | 0.459       | N4-DNP-1 | D(M2-AcCoA)              | 0.365 | 0.247       | 0.468       |
|          | D(M1-AcCoA)              | 0.030 | 0.000       | 0.091       |          | D(M1-AcCoA)              | 0.026 | 0.000       | 0.093       |
|          | 1-D(AcCoA)               | 0.601 | 0.514       | 0.690       |          | 1-D(AcCoA)               | 0.609 | 0.508       | 0.714       |
|          | g(t) palmitate           | 0.252 | 0.193       | 0.303       |          | g(t) palmitate           | 0.183 | 0.133       | 0.229       |
|          | TOTAL AcCoA contribution | 0.399 | 0.271       | 0.549       |          | TOTAL AcCoA contribution | 0.391 | 0.247       | 0.561       |
| N2-DNP-1 | D(M2-AcCoA)              | 0.464 | 0.319       | 0.590       | N4-DNP-2 | D(M2-AcCoA)              | 0.340 | 0.271       | 0.408       |
|          | D(M1-AcCoA)              | 0.021 | 0.000       | 0.117       |          | D(M1-AcCoA)              | 0.019 | 0.000       | 0.056       |
|          | 1-D(AcCoA)               | 0.515 | 0.390       | 0.650       |          | 1-D(AcCoA)               | 0.641 | 0.576       | 0.706       |
|          | g(t) palmitate           | 0.150 | 0.094       | 0.201       |          | g(t) palmitate           | 0.163 | 0.129       | 0.195       |
|          | TOTAL AcCoA contribution | 0.485 | 0.319       | 0.707       |          | TOTAL AcCoA contribution | 0.359 | 0.271       | 0.464       |
|          |                          |       |             |             | N4-DNP-3 | D(M2-AcCoA)              | 0.316 | 0.239       | 0.388       |
|          |                          |       |             |             |          | D(M1-AcCoA)              | 0.021 | 0.000       | 0.064       |
|          |                          |       |             |             |          | 1-D(AcCoA)               | 0.663 | 0.594       | 0.732       |
|          |                          |       |             |             |          | g(t) palmitate           | 0.162 | 0.126       | 0.194       |
|          |                          |       |             |             |          | TOTAL AcCoA contribution | 0.337 | 0.239       | 0.452       |
